# Supplementary material
Source: Elsevier journal article supplement (https://www.sciencedirect.com/science/article/pii/S030089321730221X)
Supplement: mmc1 [file mmc1.pdf]

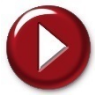

**Material suplementario**

Eficacia de una estrategia combinada para mejorar el control del colesterol unido a lipoproteínas de baja densidad en pacientes con hipercolesterolemia. Ensayo clínico aleatorizado

**Otras medidas sobre estilo de vida y alimentación saludable**

**EJERCICIO**

Se aconseja realizar al menos 30 minutos DE ACTIVIDAD FÍSICA MODERADA al día todos los días de la semana.

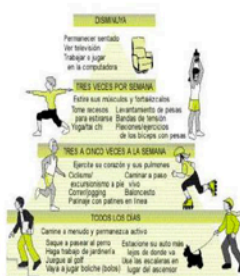

Ejemplos de actividades que requieren un esfuerzo moderado para la mayoría de las personas son:

- Caminar rápido.
- Aeróbic en el agua
- Andar en bicicleta en terreno llano o con pocas colinas
- Dobles en tenis
- Empujando una cortadora de césped
- Excursionismo
- Patinar
- Voleibol
- Baloncesto

**ALCOHOL**

Si usted bebe alcohol le recomendamos consumirlo con moderación.

Si tiene elevados los triglicéridos debe abstenerse de consumir alcohol.

**EN GENERAL**

La dieta debe ser variada.

La ingesta calórica debe adaptarse para evitar el sobrepeso y la obesidad.

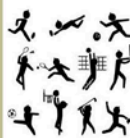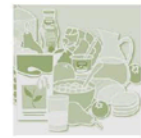

**Algunas recomendaciones para el adecuado manejo de la Hipercolesterolemia**

Además de las indicaciones que ha recibido por parte de su médico de familia y de su enfermero/a, le recordamos que para alcanzar un nivel adecuado de sus cifras de colesterol es importante:

- Seguir una serie de recomendaciones sobre su alimentación.
- **Aumentar el consumo de frutas y verduras.**
- Realizar ejercicio y evitar una vida sedentaria.
- Si le han prescrito algún tipo de medicamento para disminuir sus cifras de colesterol, éste se debe tomar todos los días en el momento que le han indicado.

## Recomendaciones dietéticas

| ALIMENTOS                           | CONSUMO DIARIO                                                                                   | MODERADO(2-3 VECES SEMANA)                                                                                                                                                                                           | NO RECOMENDADOS                                                                                                                                       |
|-------------------------------------|--------------------------------------------------------------------------------------------------|----------------------------------------------------------------------------------------------------------------------------------------------------------------------------------------------------------------------|-------------------------------------------------------------------------------------------------------------------------------------------------------|
| <b>Cereales</b>                     | Pan, pasta alimenticia, arroz, maíz (de preferencia integrales).                                 | Cereales no integrales, bollería confeccionada con aceite de girasol.                                                                                                                                                | Bollería en general, galletas, aperitivos tipo ganchitos, cortezas, etc...                                                                            |
| <b>Frutas, verduras y legumbres</b> | Todas (3 raciones de fruta y 2 o más vegetales/día)                                              | Patatas fritas de bolsa, preparadas con aceite de oliva o girasol.                                                                                                                                                   | Patatas fritas de bolsa preparadas con aceites de composición desconocida. Coco. Verduras y legumbres cocinadas con grasas tipo chorizo, beicon, etc. |
| <b>Huevos, lácteos y derivados</b>  | Leche desnatada, yogur y productos elaborados con leche desnatada, clara de huevo.               | Queso fresco o con bajo contenido graso, leche y yogur semidesnatados. Huevos enteros                                                                                                                                | Leche entera. Nata, quesos grasos, flanes, cremas, natillas, cuajadas y batidos.                                                                      |
| <b>Pescado y marisco</b>            | Pescado blanco, pescado azul, conservas al natural, marisco (cefalópodos, crustáceos y moluscos) | Conservas en aceite de oliva o girasol                                                                                                                                                                               | Frituras comerciales o con aceites no recomendados                                                                                                    |
| <b>Carnes y aves</b>                | Carne de conejo, pollo y pavo (sin piel ni grasa). Aves de corral.                               | Ternera, vaca, buey, caballo, cordero, cerdo, jamón (partes magras), caza mayor.                                                                                                                                     | Embutidos, bacon, pato, hamburguesas, salchichas, vísceras, ganso. Patés.                                                                             |
| <b>Grasas y aceites</b>             | Aceite de oliva. (preferente)<br>Aceites de semillas (girasol, maíz).                            | Margarinas sin ácidos grasos <i>trans</i> .                                                                                                                                                                          | Mantequilla, manteca de cerdo, tocino, sebo, aceites de palma y coco.                                                                                 |
| <b>Dulces</b>                       | Repostería y postres elaborados con leche desnatada y aceite sin yema de huevo.                  | Repostería y postres caseros elaborados con leche y aceite con yema de huevo.<br>Mermelada, miel, azúcar, caramelos, helados de agua, granizados, sorbetes. Turrón y mazapán.<br>Chocolate con más del 65% de cacao. | Chocolate con menos del 65% de cacao. Pastelería y bollería en general.<br>Postres que contienen leche entera o mantequilla.                          |
| <b>Bebidas</b>                      | Agua mineral, zumos naturales, infusiones. Café y té (tres al día).                              |                                                                                                                                                                                                                      | Refrescos azucarados.                                                                                                                                 |
| <b>*Frutos secos</b>                | Almendras, avellanas, nueces, cacahuets mejor crudos sin sal.                                    |                                                                                                                                                                                                                      |                                                                                                                                                       |
| <b>Espicias y salsas</b>            | Todas las especias. Salsas elaboradas con aceite de oliva, vinagre, mostaza o alioli.            | Mahonesa hecha con huevo.                                                                                                                                                                                            | Bechamel y salsas hechas con mantequilla, leche entera o grasas de origen animal.                                                                     |

Fuente: Guía Manejo de las Dislipemias en AP. Grupo de trabajo de la semFyC. 2012.

**Otras medidas sobre estilo de vida y alimentación saludable**

**EJERCICIO**

Se aconseja realizar **al menos 30 minutos DE ACTIVIDAD FÍSICA MODERADA** al día todos los días de la semana.

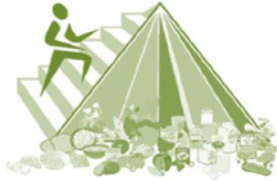

**Ejemplos de actividades que requieren un esfuerzo moderado para la mayoría de las personas son:**

- Caminar rápido.
- Andar en bicicleta en terreno llano o con pocas colinas
- Empujando una cortadora de césped
- Patinar
- Baloncesto
- Aerobic en el agua
- Dobles en tenis
- Excursionismo
- Voleibol

**ALCOHOL**

Si usted bebe alcohol le recomendamos consumirlo con moderación .

Si tiene elevados los triglicéridos debe abstenerse de consumir alcohol.

**EN GENERAL**

La dieta debe ser variada.

La ingesta calórica debe adaptarse para evitar el sobrepeso y la obesidad.

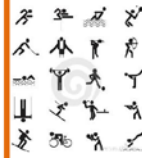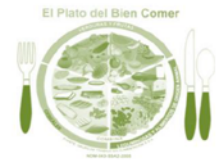

**Algunas recomendaciones para el adecuado manejo de la Hipercolesterolemia**

Además de las indicaciones que ha recibido por parte de su médico de familia y de su enfermero/a, le recordamos que para alcanzar un nivel adecuado de sus cifras de colesterol es importante:

- Seguir una serie de recomendaciones sobre su alimentación.  
**Aumentar el consumo de frutas y verduras.**
- Realizar ejercicio y evitar una vida sedentaria.
- Si le han prescrito algún tipo de medicamento para disminuir sus cifras de colesterol, éste se debe tomar todos los días en el momento que le han indicado.

### Consejos culinarios

- Para cocinar utilice aceite de oliva.
- Prepare los alimentos a la plancha, al vapor o al horno.
- Si los fríe evite que se impregnen excesivamente de aceite.
- Antes de cocinar retire la piel de las aves y la grasa visible de las carnes.
- Cuando prepare caldo de pollo o carne, déjelo enfriar y retire la capa de grasa que se forma en la superficie.
- Para elaborar salsas utilice caldos vegetales, leche desnatada y aceite de oliva.
- Evite la mantequilla, leche entera y grasas animales en general.
- No consuma alimentos preparados con aceites vegetales cuya naturaleza no está identificada.
- Condimente sus platos con hierbas y especias. Vaya de compras con una lista de alimentos saludables.
- Al **cocinar** preferir los hervidos, asados, plancha y parrilla (fritos con moderación, sobre todo si hay sobrepeso).

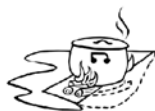

### Consejos sobre la Dieta

- 4-5 raciones/día de **cereales** (pan, arroz, maíz, cereales de desayuno, pastas) y **tubérculos** (patatas), recomendables los integrales. Una ración = una rebanada de pan, 30 gr de cereales secos, medio vaso de pasta o cereal cocido.
- Consuma al día **verduras u hortalizas** (al menos dos raciones de 150 g)
- **Legumbres** al menos una ración (medio vaso) tres veces por semana.
- **Frutas**, al menos, 3 piezas/ día (incluye zumo natural).
- **Frutos secos** o semillas dos veces a la semana.
- Consumir preferentemente **aceite de oliva virgen**.
- Restrinja **carnes rojas** (menos de dos veces a la semana) sustituir por cortes magros de ternera, cerdo o cordero, eliminando la grasa visible antes de cocinar. La volatería (excepto pato y ganso) debe consumirse sin piel. Evitar vísceras y embutidos.
- Se puede tomar jamón serrano (si es posible de cerdo ibérico alimentado con bellota) no más de dos veces por semana. El fiambre de pavo puede consumirse con moderación.
- Al menos tres veces por semana consuma **pescado y marisco** (sustituirán a varios platos semanales de carne) sobre todo azul (atún, sardina, caballa, anchoa, trucha, anguila alto contenido en ácidos grasos omega-3).
- Reducir consumo de **leche** entera y derivados (quesos grasos, yogures enteros, mantequilla, helados, nata). 2 vasos de leche desnatada o semidesnatada al día y una porción de queso tierno (30 g) dos a tres veces por semana. Los quesos curados o grasos no son aconsejables.
- No tomar más de 2-3 **huevos**, con yema, a la semana (considerar que se incluyen en rebozados, mahonesas). La clara de huevo es de consumo libre.

Fuente: **Guía Manejo de las Dislipemias en AP. Grupo de trabajo de la semFyC. 2012.**

## SMS EFESCOM

Se enviaron los mensajes de texto que se muestran a continuación durante todo el seguimiento a los participantes de grupo intervención. Estos fueron enviados desde un terminal específico utilizado para este estudio.

Mensaje 0. Bienvenida.- Estimad@ señor@: Bienvenido al estudio EFESCOM. Como le han indicado, periódicamente recibirá mensajes sobre recomendaciones para mejorar su salud y recordándole sus próximas visitas.

Mensaje Recordatorio Visita.- Estimad@ señor@ le recordamos que tiene Usted programada una visita con su médico de familia el día DD de MM en su Centro de Salud. Un afectuoso saludo. EFESCOM

Mensaje 1.- Le recomendamos realice al menos 30 minutos de ACTIVIDAD FÍSICA MODERADA al día (caminar, bicicleta, nadar) todos los días de la semana. Un saludo. EFESCOM

Mensaje 2.- Si le han prescrito algún medicamento para disminuir sus cifras de colesterol, éste se debe tomar todos los días en el momento que le han indicado. EFESCOM

Mensaje 3.- Le recomendamos que realice una dieta variada, con un adecuado consumo de frutas y verduras. Un saludo. EFESCOM

Mensaje 4.- Le recordamos que para alcanzar un nivel adecuado de sus cifras de colesterol es importante realizar ejercicio y evitar una vida sedentaria. EFESCOM

Mensaje 5.- Si Usted bebe alcohol, le recomendamos consumirlo con moderación. Un saludo. EFESCOM.

Mensaje 6.- Le recomendamos que prepare sus alimentos a la plancha, al vapor o al horno. Si los fríe evite que se impregnen excesivamente de aceite. Un saludo EFESCOM

Mensaje 7.- Le recomendamos que si tiene elevados los triglicéridos debe abstenerse de consumir alcohol. Un saludo. EFESCOM

Mensaje 8.- Le recomendamos que en su dieta consuma 4 ó 5 raciones de cereales (pan, arroz, pasta, cereales en desayuno) y tubérculos (patatas). EFESCOM

Mensaje 9.- Le recordamos que si Usted toma medicación para controlar su colesterol debe tomarlos como su médico le ha prescrito. Un saludo. EFESCOM

Mensaje 10.- Desde EFESCOM le recomendamos que realice ejercicio físico moderado todos los días. Un saludo.

Mensaje 11.- Le recomendamos que realice un consumo diario de 5 raciones entre fruta y verduras. Un saludo. EFESCOM.

Mensaje 12.- Desde EFESCOM le recordamos que no debe abusar de alimentos fritos, es más saludable consumirlos al vapor o a la plancha. Un saludo.

Mensaje 13.- Le recordamos que realice ACTIVIDAD FÍSICA moderada para mantener en cifras normales sus niveles de colesterol. EFESCOM

Mensaje 14.- Si Usted tiene elevados los niveles de triglicéridos, le recomendamos abstenerse de consumir alcohol. Un saludo. EFESCOM

Mensaje 15.- Desde EFESCOM le recordamos que mantener un peso adecuado ayuda a mantener los niveles de colesterol estables.

Mensaje 16.- Reducir la ingesta de alcohol evita el exceso de peso y realizar Ejercicio Físico son herramientas (armas) para reducir los niveles de colesterol.

Mensaje 17.- Le recomendamos que realice un consumo diario de frutas y verduras en su dieta. Un saludo. EFESCOM.

Mensaje 18.- Le recordamos que realizar al menos 30 minutos de Actividad Física le ayudara a reducir su colesterol. EFESCOM

Mensaje 19.- Desde EFESCOM le aconsejamos que realice una dieta variada con un adecuado consumo de frutas y verduras.

Mensaje 20.- Desde EFESCOM le recordamos que si Usted toma medicación para controlar su colesterol, debe tomarlo como su médico le ha prescrito. Un saludo.

Mensaje 21.- Le recomendamos que realice Actividad Física todos los días, esto le ayudara a controlar sus niveles de colesterol. Un saludo. EFESCOM

Mensaje 22.- Le recordamos que si Usted toma medicación para controlar su colesterol debe hacerlo como su médico le prescriba. EFESCOM

Mensaje 23.- Le recomendamos que no abuse de alimentos fritos, es más saludable consumirlos al vapor o a la plancha. Un saludo. EFESCOM.

Mensaje 24.- Si Usted bebe alcohol le recomendamos consumirlo con moderación. Un saludo. EFESCOM.

Mensaje 25.- Le recordamos que el tratamiento dietético del colesterol elevado es el pilar básico sobre el que se apoya el tratamiento farmacológico. EFESCOM.

Mensaje 26.- Le recordamos que el pescado blanco puede sustituir en su dieta a algunos platos de carne. EFESCOM.

Mensaje época navideña.- Le deseamos unas felices Fiestas y le recordamos que el consumo excesivo de alimentos puede incrementar su colesterol. EFESCOM.

Mensaje Final.- Estimad@ señor@: Los miembros del equipo EFESCOM le manifestamos nuestro agradecimiento por su participación en este estudio.



**Ficha autocumplimentada**

Apreciado Sr/Sra:

Le pedimos que siga las recomendaciones de su médico/a o enfermero/a para completar esta ficha. Es preciso que la entregue en cada una de las visitas concertadas a lo largo de este estudio.

Nombre y apellidos \_\_\_\_\_

Código de Identificación: \_\_\_\_\_

Nota para investigadores: Indicar fechas al paciente.

• Cita para la próxima visita: \_\_\_\_ - \_\_\_\_ - \_\_\_\_

• **APARTADO A:** a rellenar en 5 ocasiones hasta la próxima visita. Marcar una X.

| SEMANAS                                                          | Ningún día | 1-3 días | 4-6 días | Los 7 días |
|------------------------------------------------------------------|------------|----------|----------|------------|
| <b>SEMANA 1</b> LUNES__ A DOMINGO__ MES _____                    |            |          |          |            |
| He seguido las recomendaciones sobre alimentación                |            |          |          |            |
| He realizado ejercicio aeróbico durante 30 minutos o más         |            |          |          |            |
| He tomado mi tratamiento para el colesterol como me han indicado |            |          |          |            |
| <b>SEMANA 2</b> LUNES__ A DOMINGO__ MES _____                    |            |          |          |            |
| He seguido las recomendaciones sobre alimentación                |            |          |          |            |
| He realizado ejercicio aeróbico durante 30 minutos o más         |            |          |          |            |
| He tomado mi tratamiento para el colesterol como me han indicado |            |          |          |            |
| <b>SEMANA 3</b> LUNES__ A DOMINGO__ MES _____                    |            |          |          |            |
| He seguido las recomendaciones sobre alimentación                |            |          |          |            |
| He realizado ejercicio aeróbico durante 30 minutos o más         |            |          |          |            |
| He tomado mi tratamiento para el colesterol como me han indicado |            |          |          |            |
| <b>SEMANA 4</b> LUNES__ A DOMINGO__ MES _____                    |            |          |          |            |
| He seguido las recomendaciones sobre alimentación                |            |          |          |            |
| He realizado ejercicio aeróbico durante 30 minutos o más         |            |          |          |            |
| He tomado mi tratamiento para el colesterol como me han indicado |            |          |          |            |
| <b>SEMANA 5</b> LUNES__ A DOMINGO__ MES _____                    |            |          |          |            |
| He seguido las recomendaciones sobre alimentación                |            |          |          |            |
| He realizado ejercicio aeróbico durante 30 minutos o más         |            |          |          |            |
| He tomado mi tratamiento para el colesterol como me han indicado |            |          |          |            |

- **APARTADO B. Alimentación (a rellenar una vez cada dos meses). Indicar cuándo es conveniente (diferente semana al cuestionario de actividad física).**

| Cuestionario de Frecuencia de Consumo Alimentario - CFCA  |                      |        |
|-----------------------------------------------------------|----------------------|--------|
| LISTADO DE ALIMENTOS                                      | ¿CUÁNTAS VECES COME? |        |
|                                                           | A LA SEMANA          | AL MES |
| Leche                                                     |                      |        |
| Chocolate: tableta, bombones, "Kit Kat", "Mars"...        |                      |        |
| Cereales inflados de desayuno ("Corn-Flakes", "Kellog's") |                      |        |
| Galletas tipo "maría"                                     |                      |        |
| Galletas con chocolate, crema...                          |                      |        |
| Magdalenas, bizcocho...                                   |                      |        |
| Ensamada, donut, croissant...                             |                      |        |
|                                                           |                      |        |
| Ensalada: lechuga, tomate, escarola...                    |                      |        |
| Judías verdes, acelgas o espinacas                        |                      |        |
| Verduras de guarnición: berenjena, champiñones            |                      |        |
| Patatas al horno, fritas o hervidas                       |                      |        |
| Legumbres: lentejas, garbanzos, judías...                 |                      |        |
| Arroz blanco, paella                                      |                      |        |
| Pasta: fideos, macarrones, espaguetis...                  |                      |        |
| Sopas y cremas                                            |                      |        |
|                                                           |                      |        |
| Huevos                                                    |                      |        |
| Pollo o pavo                                              |                      |        |
| Ternera, cerdo, cordero (bistec, empanada,...)            |                      |        |
| Pescado blanco: merluza, mero,...                         |                      |        |
| Pescado azul: sardinas, atún, salmón,...                  |                      |        |
| Marisco: mejillones, gambas, langostinos, calamares,...   |                      |        |
| Croquetas, empanadillas, pizza                            |                      |        |
| Pan (en bocadillo, con las comidas,...)                   |                      |        |
|                                                           |                      |        |
| Jamón salado, dulce, embutidos                            |                      |        |
| Queso blanco o fresco (Burgos,...) o bajo en calorías     |                      |        |
| Otros quesos: curados o semicurado, cremosos              |                      |        |
|                                                           |                      |        |
| Frutas cítricas: naranja, mandarina,...                   |                      |        |
| Otras frutas: manzana, pera, melocotón, plátano...        |                      |        |
| Frutas en conserva (en almibar...)                        |                      |        |
| Zumos de fruta natural                                    |                      |        |
| Frutos secos: cacahuets, avellanas, almendras,...         |                      |        |
| Postres lácteos: natillas, flan, requesón                 |                      |        |
| Pasteles de crema o chocolate                             |                      |        |
| Bolsas de aperitivos («chips», «chetos», «fritos»...)     |                      |        |
| Golosinas: gominolas, caramelos...                        |                      |        |
| Helados                                                   |                      |        |
|                                                           |                      |        |
| Bebidas azucaradas ("coca-cola", "Fanta"...)              |                      |        |
| Bebidas bajas en calorías (coca-cola light...)            |                      |        |
| Vino, sangría                                             |                      |        |
| Cerveza                                                   |                      |        |
| Cerveza sin alcohol                                       |                      |        |
| Bebidas destiladas: whisky, ginebra, coñac,...            |                      |        |

**FECHA CUMPLIMENTACIÓN:** \_\_\_\_ - \_\_\_\_ - \_\_\_\_



• **APARTADO C. Actividad física (a rellenar una vez cada dos meses). Indicar cuándo es conveniente (diferente semana al cuestionario de alimentación).**

Las preguntas se referirán acerca del tiempo que usted utilizó siendo físicamente activo(a) en los **últimos 7 días**.

• Piense en todas aquellas actividades **vigorosas** que usted realizó en los **últimos 7 días** (actividades que usted hace como parte del trabajo, en el jardín y en la casa, para ir de un sitio a otro, y en su tiempo libre de descanso, ejercicio o deporte). Actividades **vigorosas** son las que requieren un esfuerzo físico fuerte y le hacen respirar mucho más fuerte que lo normal. Piense *solamente* en esas actividades que usted hizo por lo menos 10 minutos continuos.

|                                                                                                                                                                                            |                                                                                                                                             |
|--------------------------------------------------------------------------------------------------------------------------------------------------------------------------------------------|---------------------------------------------------------------------------------------------------------------------------------------------|
| 1. Durante los <b>últimos 7 días</b> , ¿Cuántos días realizó usted actividades físicas <b>vigorosas</b> como levantar objetos pesados, excavar, aeróbicos, o pedalear rápido en bicicleta? | <input type="checkbox"/> <b>días por semana</b><br><input type="checkbox"/> Ninguna actividad física vigorosa ➔ <i>Pase a la pregunta 3</i> |
|--------------------------------------------------------------------------------------------------------------------------------------------------------------------------------------------|---------------------------------------------------------------------------------------------------------------------------------------------|

|                                                                                                                                  |                                                                                                                                                        |
|----------------------------------------------------------------------------------------------------------------------------------|--------------------------------------------------------------------------------------------------------------------------------------------------------|
| 2. ¿Cuánto tiempo en total usualmente le tomó realizar actividades físicas <b>vigorosas</b> en uno de esos días que las realizó? | <input type="checkbox"/> <b>horas por día</b><br><input type="checkbox"/> <b>minutos por día</b><br><input type="checkbox"/> No sabe/No está seguro(a) |
|----------------------------------------------------------------------------------------------------------------------------------|--------------------------------------------------------------------------------------------------------------------------------------------------------|

• Piense en de todas aquellas actividades **moderadas** que usted realizo en los **últimos 7 días**. Actividades **moderadas** son aquellas que requieren un esfuerzo físico moderado y le hace respirar algo más fuerte que lo normal. Piense *solamente* en esas actividades que usted hizo por lo menos 10 minutos continuos.

|                                                                                                                                                                                                                             |                                                                                                                                             |
|-----------------------------------------------------------------------------------------------------------------------------------------------------------------------------------------------------------------------------|---------------------------------------------------------------------------------------------------------------------------------------------|
| 3. Durante los <b>últimos 7 días</b> , ¿Cuántos días hizo usted actividades físicas <b>moderadas</b> tal como cargar objetos livianos, pedalear en bicicleta a paso regular, o jugar dobles de tenis? No incluya caminatas. | <input type="checkbox"/> <b>días por semana</b><br><input type="checkbox"/> Ninguna actividad física moderada ➔ <i>Pase a la pregunta 5</i> |
|-----------------------------------------------------------------------------------------------------------------------------------------------------------------------------------------------------------------------------|---------------------------------------------------------------------------------------------------------------------------------------------|

|                                                                                                                |                                                                                                                                                        |
|----------------------------------------------------------------------------------------------------------------|--------------------------------------------------------------------------------------------------------------------------------------------------------|
| 4. Usualmente, ¿Cuánto tiempo dedica usted en uno de esos días haciendo actividades físicas <b>moderadas</b> ? | <input type="checkbox"/> <b>horas por día</b><br><input type="checkbox"/> <b>minutos por día</b><br><input type="checkbox"/> No sabe/No está seguro(a) |
|----------------------------------------------------------------------------------------------------------------|--------------------------------------------------------------------------------------------------------------------------------------------------------|

• Piense acerca del tiempo que usted dedicó a caminar en los **últimos 7 días**. Esto incluye trabajo en la casa, caminatas para ir de un sitio a otro, o cualquier otra caminata que usted hizo únicamente por recreación, deporte, ejercicio, o placer.

|                                                                                                      |                                                                                                                     |
|------------------------------------------------------------------------------------------------------|---------------------------------------------------------------------------------------------------------------------|
| 5. Durante los <b>últimos 7 días</b> , ¿Cuántos días caminó usted por al menos 10 minutos continuos? | <input type="checkbox"/> <b>días por semana</b><br><input type="checkbox"/> No caminó ➔ <i>Pase a la pregunta 7</i> |
|------------------------------------------------------------------------------------------------------|---------------------------------------------------------------------------------------------------------------------|

|                                                                                  |                                                                                                                                                        |
|----------------------------------------------------------------------------------|--------------------------------------------------------------------------------------------------------------------------------------------------------|
| 6. Usualmente, ¿Cuánto tiempo gastó usted en uno de esos días <b>caminando</b> ? | <input type="checkbox"/> <b>horas por día</b><br><input type="checkbox"/> <b>minutos por día</b><br><input type="checkbox"/> No sabe/No está seguro(a) |
|----------------------------------------------------------------------------------|--------------------------------------------------------------------------------------------------------------------------------------------------------|

• La última pregunta se refiere al tiempo que usted permaneció **sentado(a)** en la semana en los **últimos 7 días**. Incluya el tiempo sentado(a) en el trabajo, la casa, estudiando, y en su tiempo libre. Esto puede incluir tiempo sentado(a) en un escritorio, visitando amigos(as), leyendo o permanecer sentado(a) o acostado(a) mirando televisión.

|                                                                                                            |                                                                                                                                                        |
|------------------------------------------------------------------------------------------------------------|--------------------------------------------------------------------------------------------------------------------------------------------------------|
| 7. Durante los <b>últimos 7 días</b> , ¿Cuánto tiempo permaneció <b>sentado(a)</b> en un día en la semana? | <input type="checkbox"/> <b>horas por día</b><br><input type="checkbox"/> <b>minutos por día</b><br><input type="checkbox"/> No sabe/No está seguro(a) |
|------------------------------------------------------------------------------------------------------------|--------------------------------------------------------------------------------------------------------------------------------------------------------|

FECHA CUMPLIMENTACIÓN: \_\_\_ - \_\_\_ - \_\_\_\_

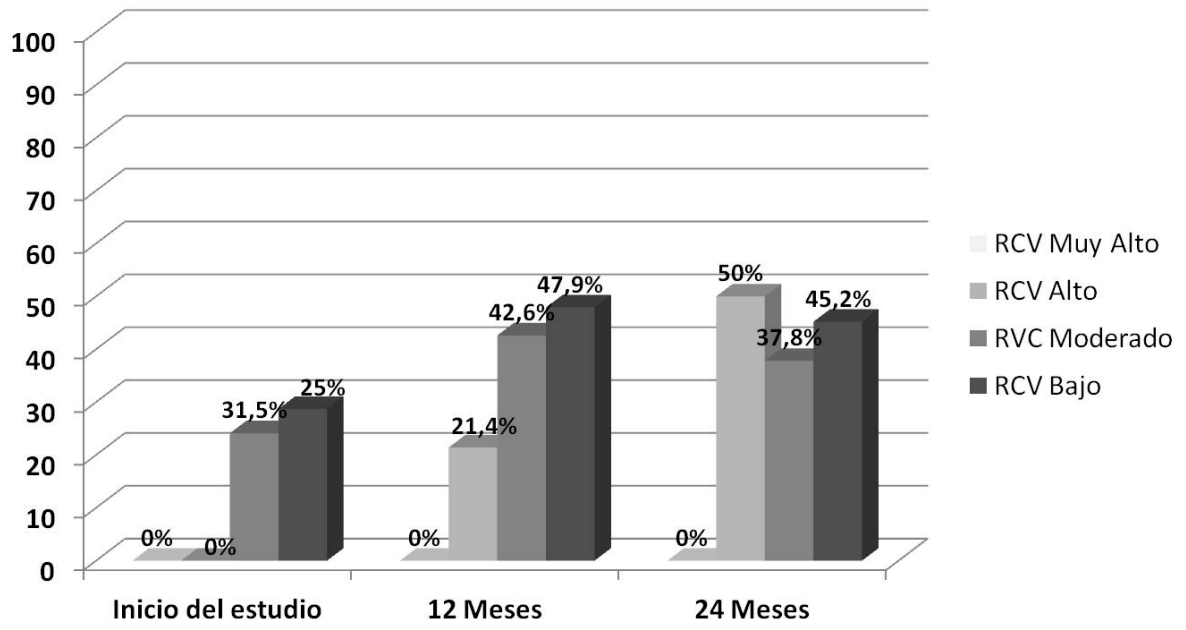

Modelo de regresión lineal múltiple para las variables relacionadas con mayor reducción de las cifras de colesterol unido a lipoproteínas de baja densidad a los 12 y 24 meses.

| <b>Variabes</b>                           | <b><math>\beta</math></b> | <b>IC 95%</b>   | <b>t</b> | <b>p</b> |
|-------------------------------------------|---------------------------|-----------------|----------|----------|
| <b>Al cabo de 12 meses de seguimiento</b> |                           |                 |          |          |
| Constante                                 | -21,56                    | -58,01 a -14,90 | -        | -        |
| Intervención realizada                    | 10,48                     | 3,13 a 17,83    | 2,81     | 0,005    |
| Grupo de RCV más alto                     | 6,38                      | 2,29 a 10,48    | 3,07     | 0,002    |
| Valor superior basal de c-LDL en plasma   | 0,62                      | 0,52 a 0,72     | 12,00    | <0,001   |
| Menor edad (más joven)                    | 0,45                      | -0,02 a 0,93    | 1,90     | 0,059    |
| <b>Al cabo de 24 meses de seguimiento</b> |                           |                 |          |          |
| Constante                                 | -66,56                    | -84,21 a -48,92 | -        | -        |
| Intervención realizada                    | 8,21                      | 0,54 a 15,89    | 2,11     | 0,036    |
| Grupo de RCV más alto                     | 4,77                      | 0,54 a 8,99     | 2,23     | 0,027    |
| Valor superior basal de c-LDL en plasma   | 0,69                      | 0,58 a 0,79     | 12,72    | <0,001   |
| Presentar hipertensión arterial           | 8,8                       | 0,77 a 16,92    | 2,16     | 0,032    |

cLDL: colesterol unido a lipoproteínas de baja densidad; IC95%: intervalo de confianza del 95%; RCV: riesgo cardiovascular.
